# Supplementary material
Source: MDPI journal article supplement (https://www.mdpi.com/2673-3897/3/3/18)
Supplement: s1 [file s1]

**Supplementary table S1:** Candidate causal pathways and genes associated with pathways affecting male fertility

| Index | Candidate causal pathway     | Description                                                  | Nominal P Value | FDR   | Gene mapped with variant                | Number of Genes Involved |
|-------|------------------------------|--------------------------------------------------------------|-----------------|-------|-----------------------------------------|--------------------------|
| 1     | Mhc Pathway                  | Antigen Processing and Presentation                          | 0.002           | 0.001 | HLA-DRB1, HLA-DRA                       | 2                        |
| 2     | TCRA Pathway                 | Lck and Fyn tyrosine kinases in initiation of TCR Activation | 0.002           | 0.001 | HLA-DRB1, HLA-DRA                       | 2                        |
| 3     | IL5 Pathway                  | IL 5 Signaling Pathway                                       | 0.002           | 0.001 | HLA-DRB1, HLA-DRA                       | 2                        |
| 4     | B-cell Pathway               | Antigen Dependent B Cell Activation                          | 0.002           | 0.001 | HLA-DRB1, HLA-DRA                       | 2                        |
| 5     | Eosinophils Pathway          | The Role of Eosinophils in the Chemokine Network of Allergy  | 0.002           | 0.001 | HLA-DRB1, HLA-DRA                       | 2                        |
| 6     | ctla4 Pathway                | The Co-Stimulatory Signal During T-cell Activation           | 0.002           | 0.001 | HLA-DRB1, HLA-DRA                       | 2                        |
| 7     | Inflammatory Pathway         | Cytokines and Inflammatory Response                          | 0.002           | 0.001 | HLA-DRB1, HLA-DRA                       | 2                        |
| 8     | BB-cell Pathway              | Bystander B Cell Activation                                  | 0.002           | 0.001 | HLA-DRB1, HLA-DRA                       | 2                        |
| 9     | B-lymphocyte Pathway         | B Lymphocyte Cell Surface Molecules                          | 0.002           | 0.001 | HLA-DRB1, HLA-DRA                       | 2                        |
| 10    | Graft-versus-host disease    | Graft-versus-host disease                                    | 0.001           | 0.003 | HLA-DRB1, HLA-DRA, HLA-DQA1             | 3                        |
| 11    | Allograft rejection          | Allograft rejection                                          | 0.001           | 0.003 | HLA-DRB1, HLA-DRA, HLA-DQA1             | 3                        |
| 12    | Autoimmune thyroid disease   | Autoimmune thyroid disease                                   | 0.001           | 0.003 | HLA-DRB1, HLA-DRA, HLA-DQA1             | 3                        |
| 13    | Type I diabetes mellitus     | Type I diabetes mellitus                                     | 0.001           | 0.003 | HLA-DRB1, HLA-DRA, HLA-DQA1             | 3                        |
| 14    | Asthma                       | Asthma                                                       | 0.001           | 0.003 | HLA-DRB1, HLA-DRA, HLA-DQA1             | 3                        |
| 15    | Lymphocyte Proliferation     | Expansion of Lymphocyte proliferation by cell division       | 0.003           | 0.007 | RIPK, PDCD1LG2                          | 2                        |
| 16    | Systemic lupus erythematosus | Systemic lupus erythematosus                                 | 0.001           | 0.009 | HLA-DRB1, HLA-DRA, HLA-DQA1, C1QA, C1QB | 5                        |

|    |                                                    |                                                    |       |       |                                                                                      |   |
|----|----------------------------------------------------|----------------------------------------------------|-------|-------|--------------------------------------------------------------------------------------|---|
| 17 | Th1/Th2Pathway                                     | Th1/Th2<br>Differentiation                         | 0.001 | 0.01  | HLA-DRB1,<br>IL18R1, HLA-<br>DRA                                                     | 3 |
| 18 | Drug metabolism -<br>cytochrome P450               | Drug metabolism -<br>cytochrome P450               | 0.02  | 0.02  | UGT1A8,<br>UGT1A9,<br>UGT1A10,<br>UGT1A6,<br>UGT1A7,<br>UGT1A4,<br>UGT1A5,<br>UGT1A3 | 8 |
| 19 | Metabolism of<br>xenobiotics by<br>cytochrome P450 | Metabolism of<br>xenobiotics by<br>cytochrome P450 | 0.02  | 0.02  | UGT1A8,<br>UGT1A9,<br>UGT1A10,<br>UGT1A6,<br>UGT1A7,<br>UGT1A4,<br>UGT1A5,<br>UGT1A3 | 8 |
| 20 | Androgen and<br>estrogen<br>metabolism             | Androgen and<br>estrogen metabolism                | 0.02  | 0.02  | UGT1A8,<br>UGT1A9,<br>UGT1A10,<br>UGT1A6,<br>UGT1A7,<br>UGT1A4,<br>UGT1A5,<br>UGT1A3 | 8 |
| 21 | Pentose and<br>glucuronate<br>interconversions     | Pentose and<br>glucuronate<br>interconversions     | 0.02  | 0.02  | UGT1A8,<br>UGT1A9,<br>UGT1A10,<br>UGT1A6,<br>UGT1A7,<br>UGT1A4,<br>UGT1A5,<br>UGT1A3 | 8 |
| 22 | Porphyrin and<br>chlorophyll<br>metabolism         | Porphyrin and<br>chlorophyll<br>metabolism         | 0.02  | 0.02  | UGT1A8,<br>UGT1A9,<br>UGT1A10,<br>UGT1A6,<br>UGT1A7,<br>UGT1A4,<br>UGT1A5,<br>UGT1A3 | 8 |
| 23 | Retinol<br>metabolism                              | Retinol metabolism                                 | 0.018 | 0.021 | UGT1A8,<br>UGT1A9,<br>UGT1A10,<br>UGT1A6,<br>UGT1A7,<br>UGT1A4,<br>UGT1A5,<br>UGT1A3 | 8 |
| 24 | Cell adhesion<br>molecules (CAMs)                  | Cell adhesion<br>molecules (CAMs)                  | 0.001 | 0.021 | HLA-DRB1,<br>HLA-DQA1,<br>HLA-DRA,<br>PDCD1LG2                                       | 4 |

|    |                                                  |                                                                                                                                                                                          |       |       |                                                                          |   |
|----|--------------------------------------------------|------------------------------------------------------------------------------------------------------------------------------------------------------------------------------------------|-------|-------|--------------------------------------------------------------------------|---|
| 25 | Drug metabolism - other enzymes                  | Drug metabolism - other enzymes                                                                                                                                                          | 0.02  | 0.021 | UGT1A8, UGT1A9, UGT1A10, UGT1A6, UGT1A7, UGT1A4, UGT1A5, UGT1A3, CDA     | 9 |
| 26 | CSK Pathway                                      | Activation of Csk by cAMP-dependent Protein Kinase Inhibition                                                                                                                            | 0.019 | 0.023 | HLA-DRB1, HLA-DRA, GNB1                                                  | 3 |
| 27 | Antigen processing and presentation              | Antigen processing and presentation                                                                                                                                                      | 0.005 | 0.023 | HLA-DRB1, HLA-DRA, HLA-DQA1, NFYC                                        | 4 |
| 28 | UDP Glycosyl Transferase Activity                | Catalysis of the transfer of a glycosyl group from a UDP-sugar to a small hydrophobic molecule                                                                                           | 0.017 | 0.024 | UGT1A8, UGT1A9, UGT1A10, UGT1A6, UGT1A7, UGT1A4, UGT1A5, UGT1A3, EXTL1   | 9 |
| 29 | T Cell Activation                                | The change in morphology and behavior of a mature or immature T cell resulting from exposure to a mitogen, cytokine, chemokine, cellular ligand, or an antigen for which it is specific. | 0.015 | 0.024 | RIPK2, PDCD1LG2, DDOST                                                   | 3 |
| 30 | Transferase Activity Transferring Hexosyl Groups | Catalysis of the transfer of a hexosyl group from one compound (donor) to another (acceptor)                                                                                             | 0.015 | 0.024 | UGT1A8, UGT1A9, UGT1A10, UGT1A6, UGT1A7, UGT1A4, UGT1A5, UGT1A3, EXTL1   | 9 |
| 31 | Starch and sucrose metabolism                    | Starch and sucrose metabolism                                                                                                                                                            | 0.018 | 0.024 | UGT1A8, UGT1A9, UGT1A10, UGT1A6, UGT1A7, UGT1A4, UGT1A5, UGT1A3, ATP13A2 | 9 |
| 32 | Hematopoietic cell lineage                       | Hematopoietic cell lineage                                                                                                                                                               | 0.023 | 0.025 | HLA-DRB1, HLA-DRA, CSF3R                                                 | 3 |
